# Supplementary material for: Lessons Learned from Different Types of Building Defect Information Sources
Source: Preprints.org preprint supplement (doi:10.20944/preprints202403.1266.v1), 2024-03-21
Supplement: Supplementary file 1 [file supplementary]

## Sheet: Literature
Author	Publication year	Title	Published	Country	Main motivation of the study	Most common building defect	Short description	Citations	Type of building	Number of buildings	Type of building defects	Building defect definition	Classification of defects?	Number of building defects	Type of information source	Include negative aspects of source? (Quotation)	Data collected by	Period	Phase
De Vos	2020	Statistical Analysis on Belgiumn Building Defects	Building and Environment	Belgium	Systematization in data collection	Moisture problems	The papers of De Vos et al. [8] and Van Deen Bossche et al. [9] were based on a collection of building defects cases from 1991 to 2019, provided by the largest Belgian insurance company. The total amount of cases collected was 27,074, which were processed and filed by jurists or engineers. Of these cases, De Vos et al. [8] selected four categories to analyse, which included problems with moisture…	1	-	-	-	None	No	13068	Insurance company database	"The database from the insurance company contains 27 074 documented cases, which have been processed and filed by either jurists or engineers between 1991 and 2019 working at the company. Since jurists are not trained in building science, there is perhaps a possibility that some damage cases are incorrectly diagnosed or documented in the database. However, for technical more complex cases a const…	Insurance company: jurists or engineers	1991-2019	Liability period
Van Deen Bossche	2022	The impact of demographical, geographical and climatological factors on building defects in Belgium	International Journal of Building Pathology and Adaptation	Belgium	Systematization in data collection	Moisture problems	The study of Van Den Bossche et al. [9] was a follow-up study of [8], focusing on the geographical variability of building defects. The authors aimed to identify external factors that contribute to building defects. The new knowledge that was acquired might con-tribute to improved quality control and prevention of defects. The study found that wind speed and the number of walls the building share…	2	-	-	-	None	Yes	9918	Insurance company database	"The cases reported to the insurance company only represent a portion of the building defects Market share of the insurance company is not the same all over Belgium (Som geographical areas are more represented in the analysis than others.) An important drawback of using the claims database of an insurance company as the starting point of the study is that almost the whole analysis is based on pro…	Insurance company	1991-2019	Liability period
Sandanayake et al.	2021	Residential building defects investigation and mitigation – a comparative review in Victoria, Australia, for understanding the way forward	Engineering Construction & Architectural Management	Australia	Quality Management	-	A similar study from Australia by Sandanayake et al. [2] used data collected by the Victorian Managed Insurance Authority (VMIA) between 2011 and 2018. The insurance company had gathered a total of 8,128 defects, and this study analysed 3,048 unique claims of the total. The main purpose for the study by Sandanayake et al. [2] was to develop a meth-odological framework to improve quality managemen…	13	Residential	-	-	None	No	8128	Insurance company database	None	Insurance company	2011-2018	Unknown
Gullbrekken	2016	Norwegian pitched roof defects	Buildings	Norway	Overview of typical defects	Moisture problems	The main purpose for the study by Gullbrekken et al. [35] was to get an overview of typical building defects in pitched wooden roofs. It was found that deficiencies in the design, materials, or workmanship accounted for more than half of the defects by allowing precipitation or indoor moisture to enter the building envelope.	26		2423	Process-included building defects	Kvande and Lisø, 2009	No	2423	Private databases	"Although a large archive, due to a relatively limited number of specific cases, the building defect archive may not represent a satisfactory description of all building defects in Norway. A relatively high cost related to the engagement of SINTEF has led to professional customers being the dominant share of the cases in the archive (as compared to private householders). Furthermore, it is likely…	Reserch institute	1993-2002	Unknown
Kvande	2009	Climate adapted design of masonry structures	Building and Environment	Norway	Design challenges	Moisture problems	Kvande & Lisø [34] had the main purpose of presenting design challenges related to masonry structures. The investigation of 302 masonry defects found restrained shrinkage and thermal movement to be the most frequent defect category. In addition, driving rain and frost action were found to be the most considered climatic challenges in maintaining high-performance masonry structures. Many of the cr…	23	masonry	61	Process-included building defects	Ingvaldsen, 2001	No	302	Private databases	"Furthermore, it is likely that the archive includes major and expensive cases of building defects rather than smaller-scale and more private issues. One of the advantages of the archive is the large number of cases collected over a long period of time. In addition, the archive contains thorough and detailed descriptions of the defects and possible causes of the defects, and the documents are pre…	Reserch institute	1983-2002	Unknown
Kvande	2018	Durability of ETICS with Rendering in Norway—Experimental and Field Investigations	Buildings	Norway	Identification	-	The main purpose for Kvande et al. [36] was to identify the variables that affect the performance of ETICS with rendering. The study discovered that ETICS are vulnerable to intense driving rain and that the two-stage tightening approach is a more reliable option than ETICS in those locations. One of the most frequent causes of the ETICS defects identified was incorrect assembly of the ETICS compo…	47	ETICS	61	-	None	No	150	Private databases	"As SINTEF has only investigated a limited number of building-defect cases, this building-defect archive does not adequately describe the extent of building defects in Norway. The likelihood of a given defect to be featured in the archive inversely increases in proportion to the ease of finding a satisfactory solution to the problem; it is also inversely proportional to the ease of attributing re…	Reserch institute	1993-2017	Unknown
Lisø	2006	Learning from experience - An analysis of process induced building defects in Norway	Proceedings of the 3rd International Building Physics Conference - Research in Building Physics and Building Engineering	Norway	Overview of typical defects	Moisture problems	The main purpose for Lisø et al. [6] was to get an overview of the typical process behind different defects. This paper found that 66% of the cases were related to the building envelope and that moisture-related defects represented 76% of the 2,423 cases registered, while 22% of the cases were located on the roof. The authors also found that numerous defects were recurrent, which indicated that t…	15	-	-	Process-included building defects	Ingvaldsen, 2001	Yes	2423	Private databases	"The analysis is based on building defect assignments carried out by SINTEF Building and Infrastructure and thus cannot aspire to represent a complete and defini- tive overview of process induced building defects in Norway. In geographic terms, building defect assign- ments forming part of the investigated 10-year period have been carried out in 182 municipalities out of a total of 436 municipali…	Reserch institute	1993-2002	Unknown
Ilozor	2004	Understanding residential house defects in Australia from the State of Victoria	Building and Environment	Australia	Identification	-	In Australia, Ilozor et al. [37] studied the Archicentre’s database for residential building defect inspections. A total of 42,753 houses were inspected, and the defects identified were systematically collected in the Archicentre's database. The main purpose of Ilozor et al. [37] was to identify whether there is a pattern or sequence in the relations between typical building defects. It was found…	86	Residential	-	-	Watt, 1999		42753	Private databases	"The archival nature of the reports were considered appropriate and valid for research purposes [41], [42], [43]. The inspectors are trained to be conversant with and follow set inspection guidelines that ensure objectivity, while reducing or eliminating subjectivity. They present all data in the simple ratio scale of percentages. In addition, the data are based on a large volume of samples of re…	Archicentre		Unknown
Pamera & Gurmu	2020	Framework for building defects and their identification technologies: Case studies of domestic buildings in Melbourne, Australia	Buildings	Australia	Quality Management	Water damage	Another Australian database, collected by The Victorian Civil and Administrative Tribunal (VCAT), was used by Pamera & Gurmu [38] to select five cases so that the most prevalent defects of these could be analysed further. Another study by Pamera & Gurmu [38] also sought to develop a framework to improve building quality. This study proposed the Defects Identification and Analysis Framework. The f…	2		5		None	Yes		Private databases	" The data used in this paper was drawn from VCAT database since the tribunal collects and registers all the possible pieces of evidence related to the alleged building defects before deciding on a case (VCAT, 2019). Evidence also includes independent experts witness to decide whether the complaint lodged by the house owner is a genuine allegation or not. Hence, valid conclusions can be drawn bas…			Unknown
Lee et al.	2018	Evaluating the Impact of Defect Risks in Residential Buildings at the Occupancy Phase, Sustainability	Sustainability	South Korea	Identification	water problems	Lee et al. [40] examined 7,554 defects from 48 residential buildings to evaluate the impact of defect risk in the user phase. A risk matrix was used by Lee et al. [40] to identify risks related to building defects. They found that defects in reinforced concrete, finishing, and mechani-cal/electrical/plumbing work gave the largest economic losses. The costs related to re-inforced concrete were mai…	29	Residential	48		Watt, 1999	Yes	7554	Private databases	none	Korea’s defect liability system	2008-2017	User phase
Lee et al.	2020	Post-Handover Defect Risk Profile of Residential Buildings Using Loss Distribution Approach	Journal of Management in Engineering	South Korea	Classification	incorrect installation and missing tasks	Lee et al. [39] examined 16,701 defect from 133 resi-dential buildings to make a defect risk profile. Classification of different building defects into a defect risk matrix was the main purpose of Lee et al. [39]. The classification was based on the type of defect and work and the defect’s location. The study found that incorrect installation and missing tasks were the most severe defects.	9	-			Watt, 1999	Yes	16701	Private databases	none	Korea’s defect liability system	2008-2017	post-handover
Lee	2020	LDA-Based Model for Assessing the Defect Liability System in Residential Buildings' Maintenance Phase	Journal of Performance of Constructed Facilities	South Korea	Systematization in data collection	Water leakage	Lee et al. [10] examined 6,087 defects from 48 residential buildings and classified them into a defect classification matrix based on the defect liability period. Lee et al. [10] systematically collected data to classify the defects into a classification matrix based on the defect liability period. The study aimed to give a better distribution of the defect costs among the involved parties and to…	1	Residential	48		Watt, 1999	Yes	6087	Private databases	none	Korea’s defect liability system	2008-2017	defect liability period
Plebankiewicz and Malara	2020	Analysis of Defects in Residential Buildings Reported during the Warranty Period	Appl. Sci.	Poland	Identification	-	The database of a Polish developer with collected warranty period reports was used by Plebankiewicz & Malara [41] to identify typical defects and their occurrence between 2018 and 2020. A total of 560 defects were found in the warranty period for 432 flats. The authors validated 353 of the cases. The main purpose of Plebankiewicz & Malara [41] was to identify the building defects occurring in the…	11	Flats	432		None	Yes	560	Private databases	"The limitation of the research is the small test sample, which only allows for the formulation of research hypotheses concerning the dependence of the appearance of defects during the warranty period. Initially, the research may have had some bias, being of the same builder, a very close period of time, and buildings with similar characteristics. The authors will conduct further research. A larg…	Developer	2018-2020	Warranty period
Mundt-Petersen et al.	2023	Distribution and location of damages in Swedish buildings	Journal of Physics Conference Series 2654(1)	Sweden	Identification	mold	Mundt-Petersen et al. [13] collected building defect data from the private databases of six Swedish accredited damage investigators. A total of 1,105 defects from 265 damage investigation reports were investigated. Identification of defect types was the main purpose of Mundt-Petersen et al. [13], but the study also looked at their location. The main findings of the study were that 81% of the defe…					Their own def.	Yes	1105	Private databases	" Necessary assumptions due to lack of information were made by accredited damage investigators, either in the report or when registered in the database. In general, it was rather clear how to assess the damage reports and categorize the parameters even if there was a minor lack of information. Potential uncertainties caused by lack of information were documented. To limit the outcome, only the m…	Damage investigators	2014-2021	Unknown
Bin Talib	2021	Identifying Building Defects: From Construction Cases in Malaysia	Structural Integrity Cases in Mechanical and Civil Engineering	Malaysia	Identification	Doors and windows	Collected information from four Malaysian specialist waterproofing contractors was used by Talib & Sulieman [42] to analyse building defect cases. The information was based on 1,363 defect cases. Identification of common building defects and finding methods to solve them was the main purpose of Talib & Sulieman [42]. A total of 18 building defects were identified. It was found that gutters and do…	0				None	Yes	1055	Private databases	none	Specialist Waterproofing Contractors	2009-2019	Unknown
Lisø	2005	High-performance weather-protective flashings	Building Research and Information 33(1)	Norway	Identification	related to windowsill/weatherboard flashings	Lisø et al. (2005) investigated building damages by investigating 175 assigment reports from Norges Byggforskningsinstitutt (NBI) archive. Lisø et al. (2005) main motivation is to identify typical damages that are associated with weather-protective flashing and present best-practice solutions. It was found that 41% of the damages is related to windowsill/weatherboard flashings and 27% is related …	12	-	-	-	None	No	175	Private databases	"This paper presents a ranking of damage in connection with the design and construction of flashing. However, the survey presented has some limitations. Analysis is based on NBI’s project archives and thus cannot aspire to represent a complete and definitive over- view of damage associated with weather-protective flashing in Norway. In geographical terms, a majority of the cases of damage are nea…	Reserch institute	1963-2001	Unknown
Sassu	2014	Legal disputes and building defects: Data from tuscany	Journal of Performance of Constructed Facilities	Italy	Classification	Water damage	Sassu & De Falco [53] investigated lawsuits from the archives of district court judgments between 2000 to 2011 in Italy and classified the described defects. The court appointed an engineer to conduct an interim technical assessment on the cases to de-termine the causes and origin of the defects. The main purpose for the study of Sassu & De Falco [53] was to analyse building defects by classifica…	4	-	-		None	Yes	222	Lawsuits	none	-	2000-2011	Unknown
Wali and Ali	2019	Diagnosis and Evaluation of Defects Encountered in Newly Constructed Houses in Erbil City, Kurdistan, Iraq	Engineering and Technology Journal 37(2A)	Iraq	Identification	gaps between doors/windows and walls	A building survey of 652 newly constructed residential houses in Iraq was inves-tigated by Wali & Ali [51]. The survey was conducted directly after handover, and 6,758 defects was discovered. Wali & Ali [51] also had the main purpose of identifying the types of building defects in newly constructed residential houses. An investigation of 652 houses revealed 6,758 building defects, which was a mea…	3	newly constructed houses	652	Construction defects	Ojo and Ljatuyi; Mansor et al., 2012		6758	Building surveys	none	Authors	2009-2012	defect liability period/post-handover
Chew and. De Silva	2003	Maintainability problems of wet areas in high-rise residential buildings	Structural Survey 22(1)	Singapore	Identification	water leakage	Another study in Singapore by Chew & De Silva [7] studied cases from 67 high-rise residential buildings, ranging in age from 1 to 35 years old, using data received from site visits and accumulated reports. The reports were gathered from diverse actors in the industry such as maintenance managers, building diagnostic specialists, councils, etc. Chew & De Silva [7] limited their study to identifyin…	24	high-rise residential buildings	67		Low and Wee, 2001		Unknown	Building surveys	None	Authors	-	Unknown
Chew	2005	Defect analysis in wet areas of buildings	Construction and Building Materials	Singapore	Identification	Water leakage	In Singapore, Chew [52] studied 56 high-rise non-residential buildings that were randomly selected by conducting a building survey and interviewing the property managers. The main purpose of Chew’s [52] study was to identify the sources of building defects and important risk factors that affect the maintainability level of wet areas in buildings. The study investigated the consequences of maintai…	75	high-rise non-residential	56		None		Unknown	Building surveys	none		-	Unknown
Jesumoroti	2022	Defects in Malaysian hospital buildings	International Journal of Building Pathology and Adaptation	Malaysia	Building maintenance management	Dampness problems	Jesumoroti et al. [46] investigated building defects in relation to maintenance management in hospitals so that defects can be prevented. The main findings were re-lated to cracked floors, floor tile failures, wall tile failures, clogged toilets, and damaged windows. These defects were a result of inadequate maintenance planning, which was made worse by subpar design and construction. The defects…	0	-	-	Construction and design defects	Their own def.		63	Questionnaire surveys	none	Authors	-	User phase
Abdul-Raham	2014	Defects in affordable housing projects in Klang valley, Malaysia	Journal of Performance of Constructed Facilities	Malaysia	Quality Management	leaking pipes	The study of Abdul-Rahman et al. [44] had users as respondents, including 310 residents from affordable housing in Malaysia. Abdul-Rahman et al. [44] found that the most common defects were leaking pipes, total failure of water supply systems, cracking in concrete walls, faulty doorknobs, and concrete wall dampness. According to the study, subpar materials, subpar workmanship, and inadequate rout…	36	-			None	Yes	310	Questionnaire surveys	"The disadvantage of self-administered questionnaires, without the presence of researcher, is that respondents may misunderstand, or have difficulties understanding the questions, which leads to inaccurate answers or no answer. The researchers felt that this was a particular risk, particularly for those respondents that live in the affordable housing areas and do not have any formal education, as…	Authors	-	Unknown
Awasho	2023	Assessment of public building defects and maintenance practices: Cases in Mettu town, Ethiopia	Heliyon	Ethiopia	Building maintenance management	Non-structural cracks	In Ethiopia, main stakeholders such as consultants, contractors, and clients were the respondents of the questionary survey by Awasho & Alemu [50]. The authors used the survey to gather primary data. A total of 49 respondents answered, of which 18 were consultants, 18 were contractors, and 23 were clients. This was a response rate of 84%. The respondents were distributed on nine projects. Another…	2	-	9	Construction defects	Juran and Godfrey 1999; Atkinson, 1999	Yes		Questionnaire surveys	none	Authors	-	Unknown
Waziri	2016	Design And Construction Defects Influencing Residential Building Maintenance In Nigeria	Jordan Journal of Civil Engineering, Volume 10,	Nigeria	Building maintenance management	-	In order to collect the necessary data for analysis, Waziri [49] sent questionnaire surveys to 60 employees who work in the offices of consultants, contractors, and building owners in Nigeria. A total of 47 questionnaires, which was a response rate of 73%, were obtained and analysed. The respondents were in charge of either design, building, or maintenance of residential buildings. In Maiduguri, …	64	-		Design and construction defects	Gatlin, 2013		-	Questionnaire surveys	none	Authors	-	Unknown
Talib	2021	Achieving Zero Defects Strategy: A Quantitative Report Adjudicating the Most Common Building Defects to Look Out for	Lecture Notes in Civil Engineering	Malaysia	Identification	Water seepage	To study this, the authors conducted a questionnaire survey. The study by Talib & Sulieman [47] had 86 industry actors as respondents. Talib & Sulieman [47] also had the main purpose of identifying the most common defects. The study found that the origins of 99% of building defects were related to water seepage problems and that watertightness is therefore very important to keep in mind. The arti…	0	-	-		None			Questionnaire surveys	"This set of crosstab examination maybe not the ideal chose variables such as the first variable (dependent variable); to agree that water seepage through CFR is the most typical problem concerning building defects and the second one (independent variable); respondent’s working experience, but it implicates at certain degree there may be better variable to test into. However, the χ2’s 2 variables…	Authors	-	Unknown
Ahzahar et al	2011	A Study of Contribution Factors to Building Failures and Defects in Construction Industry	Procedia Engineering	Malaysia	Identification	-	Ahzahar et al. [45] gathered infor-mation for their study by interviewing 12 contractors and 29 consultants and conducting a questionnaire survey. The survey was sent to different actors in the Malaysian con-struction industry. Ahzahar et al. [45] identified the factors that contribute the most to defects so that time and costs can be reduced. This study identified poor quality of materials and f…	97	-	-	Building defects and building failures	Webster's Dictionary		Unknown	Questionnaire surveys	none	Authors	-	Unknown
Islam	2021	Impacts of design deficiencies on maintenance cost of high-rise residential buildings and mitigation measures	Journal of Building Engineering	Malaysia	Building maintenance management	-	In Malaysia, there were several studies on building defects based on questionnaire surveys. A literature review was conducted by Islam et al. [43], where 42 design chal-lenges and 11 mitigation measures were identified. The authors distributed 300 ques-tionnaires and collected 118 responses. All the respondents had first-hand experience from the maintenance industry. Almost half of the respondent…	16	-		Design deficiencies	None		118	Questionnaire surveys	none	Authors	-	Unknown
Zalejska-Jonsson and Hungria-Gunnelin	2019	Defects in newly constructed residential buildings: owners’ perspective	International Journal of Building Pathology and Adaptation	Sweden	Identification	leakage from rainwater	More experienced Swedish respondents answered the questionnaire survey for the study of Jonsson & Gunnelin [48]. The participants in the survey were board members of cooperative owners, and these respondents together had experience from 1,107 projects. A total of 1,563 surveys was sent out representing 394 residential buildings. Jonsson & Gunnelin [48] looked at residential buildings from an owne…		-	394		None	Yes		Questionnaire surveys	"The potential limitation of the presented study is a potential bias related to how the respondents decoded the questions. The respondents were given a possibility to describe defects as “severe problem,” “minor problem” and “no problem”; it is therefore possible that respondents considered defects as “severe” due to their personal involvement rather than as objective severity of an experienced p…	Authors	-	Unknown
Forcada et al.	2012	Influence of Building Type on Post-Handover Defects in Housing	Journal of Performance of Constructed Facilities	Spain	Identification	-	In Spain, Forcada et al. [54] investigated handovers from 95 residential buildings and looked into the quality of flats and detached houses as reported by the occupants. The main purpose of Forcada et al. [54] was to identify factors that affect the occur-rence of building defects in the post-handover stage and to determine if there is a sig-nificant difference of the quality between flats and de…	27	Residential	95		Watt, 1999		966	Client complaint forms	none	Developer		Post-handover
Forcada et al.	2013	Posthandover Housing Defects: Sources and Origins	Journal of Performance of Constructed Facilities	Spain	Identification	missing item or task	Forcada et al. [55] and Forcada et al. [56] based their study on the database of four Spanish builders. The builders had collected data based on client complaint forms from post-handover, including 2,351 defects from seven buildings. Forcada et al. [56] focused on the most common defects, and Forcada et al. [55] focused on the causes. By analysing the client complaint forms of 2,179 flats, a tota…	37	-	7		Watt, 1999		2351	Client complaint forms	none	Developer	2004-2013	Post-handover
Forcada et al.	2013	Assessment of Residential Defects at Post-Handover	Journal of Performance of Constructed Facilities	Spain	Classification	-	The main purpose for the study by Forcada et al. [56] was to identify the type and origin of building defects so that measures to prevent them can be found. The main findings of the study were that 64% of the defects were poor workmanship due to building mistakes and omissions. In addition, material quality contributed with 19% of the defects and lack of protection contributed with 16%. The two m…	48	-	7		Watt, 1999		2351	Client complaint forms	none	Developer		Post-handover
Dzulkifli et al.	2022	ANALYSIS OF BUILDING DEFECTS AT RESIDENTIAL COLLEGES: A CASE STUDY AT HIGHER EDUCATION FACILITIES, ASEAN	ASEAN Engineering Journal	Malaysia	Identification	damaged components	The client complaint forms from nine residential colleges in Malaysia were used as the dataset in the study of Dzulkifli et al. [59]. The forms collected were from the period 2012–2017. The study investigated 55,439 cases from 179 buildings. To identify the most common defects, Dzulkifli et al. [59] investigated client com-plaint forms. The main finding was that 62% of the complaints were civil d…		-	179	-	Pheng and Wee, 2001; Isa et al.		55439	Client complaint forms	none	Developer	-	User phase
Forcada et al.	2016	Handover defects: comparison of construction and post-handover housing defects	Building Research & Information	Spain	Quality Management	surface appearance	The main purpose of Forcada et al. [57] was to study if implemented quality control measures adequately carry out their functions. To address the issue, the authors compared the defects identified by the customers with the remaining defects at handover. This could give a better understanding of the nature of defects, who identifies them, and when the defects are resolved so that the quality manag…		Flats	2179		Watt, 1999		52552	Client complaint forms	none	Developer		Construction and post-handover
Shirkavand	2016	Defects at Handover in Norwegian Construction Projects	Procedia - Social and Behavioral Sciences	Norway	Identification	missing item or task	Another post-handover study from Norway by Shirkavand et al. [58] assessed the most common building defects based on seven projects. In addition, the authors conducted nine interviews with employers from both client and contractor organizations. Of these, one was a construction manager, four were project managers, two were project developers, one was a design manager, and one was an energy consul…	0	-	-		Ingvaldsen, 2001		2047	Client complaint forms	none	Developer	-	Handover
Chong & Low	2006	Latent building defects: Causes and design strategies to prevent them	Journal of Performance of Constructed Facilities	United States	Design challenges	Moisture problems	By conducting a nine month survey of 74 buildings, Chong & Low [61] investigated latent building defects in the United States. The dataset of this study was mainly based on maintenance reports from the property managers. In addition, interviews and building surveys were conducted to verify the information from the reports. Chong & Low [61] investigated design challenges and methods to prevent typ…	138	-	74	Latent Building Defects	None		2929	Maintenance reports	"The best sources of latent defects come from those who have regularly come into contact with these defects, like the maintenance contractors and property managers. However, proper records are also important to ensure data accuracy and data collection efficiency."			User phase
Pan and Thomas	2013	Defects of new-build dwellings constructed to building regulations and to the 'Code for Sustainable Homes'	Engineering, Environmental Science, Law	UK	Identification	making good or adjustments to the finished dwelling	Pan & Thomas [60] studied 3,209 defects in 327 newly built homes that were built according to the building regulation and the Code for Sustainable Homes in the United Kingdom. The dataset of the study was based on maintenance reports. A wider study by Pan & Thomas [60] had the main purpose of identifying building defects of new homes built according to the 'Code for Sustainable Homes'. The author…	2	new-build homes	327		Multiple definitions		3209	Maintenance reports	none			User phase

## Sheet: Excluded literature
Author	Publication year	Title	Published	Country	Main motivation of the study	Most common building defect	Short description	Citations	Number of buildings	Number of defects	Type of information source
Zuraidi et al.		Elements of Building defect: a review of the recent literature		-						-	-
Holme		Mould growth in buildings
Chohan	2022	Development of smart application for house condition survey	Ain Shams Engineering Journal		x Condition Survey
		Defect-based building condition assessment			x Condition Survey
		Contribution of humidity to the degradation of façade claddings in current buildings				Humidity
		Single-shot multibox detector- and building information modeling-based quality inspection model for construction projects
Palkova	2018	Moisture problems of functional joints of wooden windows - causes analysis				Moisture problems
Maj	2018	Cracked reinforced concrete walls of chimneys, silos and cooling towers as result of using formworks
Lisø	2017	Climate Adaptation Framework for Moisture-resilient Buildings in Norway	Energy Procedia	Norway		Moisture problems		13
Roy	1989	Building Defects in Equatorial Climates	Innovative Housing Practices	Singapore				0
Gurmu	2021	Fuzzy-stochastic model to assess defects in low-rise residential buildings	Journal of Building Engineering					9		252 residential buildings		x
Park	2017	Design of an enhanced defect identification system for commercial building construction	2017 Systems and Information Engineering Design Symposium, SIEDS 2017	United States	Identification	Structural cracks	This study suggest a new system to identify building defects. It was found that aerial-based defect identification system can be an efficient alternative for Human Vision Inspection.	0				x
Chohan	2022	Development of smart application for house condition survey	Ain Shams Engineering Journal		Condition Survey							x
		Defect-based building condition assessment			Condition Survey							x
		Contribution of humidity to the degradation of façade claddings in current buildings				Humidity
Wahab	2011	A review factors affecting building defects of structural steel construction. Case study: Student accommodation in UiTM Perak	Procedia Engineering	Malaysia	Quality Management			9		7		x
Pitaa	2012	Probabilistic hurricane rain model for the evaluation of mid/high-rise buildings damage due to water penetration	11th International Probabilistic Safety Assessment and Management Conference and the Annual European Safety and Reliability Conference 2012, PSAM11 ESREL 2012	United States		Water damage	In order to anticipate how much water will enter a mid- or high-rise building during a hurricane, this study presents an innovative model that combines existing building defects and estimated building envelope damage with the probabilistic assessment of impinging rain.	0
Suffian	2012	Some common maintenance problems and building defects: Our experiences	Procedia Engineering	Malaysia	Building maintenance management	Water leakage	This paper presents typical building defects due to improper maintannence.	42
Yasemin	2021	Impact of surface waterproofing on the performance of brick masonry through the moisture exposure life-cycle	Building and Environment	UK	Performance	Moisture problems		7				x
Othman	2015	A Case Study on Moisture Problems and Building Defects	Procedia - Social and Behavioral Sciences	Malaysia	Identification	Moisture problems	This paper identifies the moisture problems in Malaisian hospitals and how this effect the functionality of the hospital.	0		1
		Development of a design-for-maintainability assessment of building systems in the tropics			Building maintenance management	Blemishes		7		95		x
		A comparative review of building component rating systems		Hong Kong	Condition Survey							x
		Strategic approaches towards achieving sustainable and effective building maintenance practices in maintenance-managed buildings: A combination of expert interviews and a literature review	Journal of Building Engineering	Malaysia	Building maintenance management			15				x
	2016	Defects and behaviour of inverted flat roof from the point of building physics
		Structural Home Defects Are the Leading Cause of Mold in Buildings: The Housing and Health Service Experience
		Vapour-tight layer and its effect on surface temperatures of curtain walling
		Analysis of roof membranes damaged by mechanical and climatic loads - pilot research
Forcada et al.		Assessment of construction defects in residential buildings in Spain		Spain						3647	Two building companies’ databases
Andenæs		Footprints of failure: Quantifying carbon impacts of roof leakages in a single-family residential building		Norway
Kog	2021	Investigation of defects in a warehouse building in Singapore	Proceedings of the Institution of Civil Engineers: Forensic Engineering	Singapore	Design challenges	Water seepage	Kog (2021) investigate defects if a warehouse building in Singapore and discovered several defects that were found and looked into 2-3 years after it was constructed. One of the findings was water seepage from the ceiling.	0			x Building survey
De Jong		Lessons from defects in the construction industry (I)		The Netherlands						650	Engineering consultancy firm’s archive
Wong	2005	Water seepage in multi-storey buildings	Facilities	Hong Kong	Maintanance Management	Water seepage	Wong & Hui (2005) main motivation is to give a solution to water seepage problems in residential buildings.	8
Gurmu et al.	2020	Analysis of the causes of defects in ground floor systems of residential buildings		Australia	Identification						Building survey
Gurmu et al.	2022	Critical Evaluation of Building Defects Research: A Scientometric Analysis		-	raises the level of awareness of BD					8128	Scopus

## Sheet: Database
		Number of articles
Search string	Web of science	Scopus	ScienceDirect
"building defects" AND "moisture"	23	21	69
"building defects" AND "water"	27	23	135

## Sheet: Categoy
Type of building defect	Number of articles per building defects
Water leakage	3
Water seepage	1
Water damage	2
Moisture problems	6
Structural cracks	0
Leaking pipes	1
Non-structural cracks	1
Surface damages	0
Blemishes	0
Sum	8
Main purpose of the studies	Number of articles per
Design challenges	2
Identification	18
Overview of typical defects	2
Classification	3
Building maintenance management	4
Quality management	4
Systematization in data collection	3
	36

## Sheet: Citations
Topic category	Citations				Category	Number	Citations
Moisture problems	1				Water leakage	1
External factors	2				Moisture	0
Roof	26				Building defects	0
Moisture; Facades; Wind	23				Quality Management System	1
Moisture problems	15				Building maintenance management	3
Moisture problems	130				Roof	1
Reworks; Defects; Quality Management System	2				Insurance company	0
Water damage	2				Cracks	0
Water damage	4				Water seepage	1
Reworks; Defects; Quality Management System	36				Water damage	3
Building maintenance management	42				External factors	1
Water damage	0				Sum	11
Quality Management System	9
Water seepage	8
Water leakage	75
Building maintenance management	1
Moisture problems	13

## Sheet: Country
Country	Number of Articles
Belgium	2
Norway	6
Malaysia	7
Singapore	2
South Korea	3
Australia	3
United States	1
Italy	1
Ethiopia	1
Spain	4
Sweden	2
UK	1
Poland	1
Iraq	1
Nigeria	1
	36
Main purpose of the studies	Belgium	Norway	Malaysia	Singapore	South Korea	Australia	United States	Italy	Ethiopia	Spain	Sweden	UK	Poland	Iraq	Nigeria
Design challenges	0	1	0	0	0	0	1	0	0	0	0	0	0	0	0	2
Performance	0	0	0	0	0	0	0	0	0	0	0	0	0	0	0	0
Identification	0	3	4	2	1	1	0	0	0	2	2	1	1	1	0	18
Overview of typical defects	0	2	0	0	0	0	0	0	0	0	0	0	0	0	0	2
Classification	0	0	0	0	1	0	0	1	0	1	0	0	0	0	0	3
Building maintenance management	0	0	2	0	0	0	0	0	1	0	0	0	0	0	1	4
Quality management	0	0	1	0	0	2	0	0	0	1	0	0	0	0	0	4
Systematization in data collection	2	0	0	0	1	0	0	0	0	0	0	0	0	0	0	3
	2	6	7	2	3	3	1	1	1	4	2	1	1	1	1	36

## Sheet: Type of information source
Type of Information Source	Number of Articles
Insurance company database	3
Private databases	13
Questionnaire surveys	8
Building surveys	3
Lawsuits	1
Client complaint forms	6
Maintenance reports	2
Sum	36

## Sheet: Cases
Type of Information Source	Number of Articles	Min number of defects	Max number of defects	Totalt number of defects	Mean value of defects per category
Insurance company database	3	8128	13068	31114	10371.3
Private databases	13	150	42753	81288	6252.92
Questionnaire surveys	8	63	310	491	61.375
Building surveys	3	6758	6758	6758	2252.67
Lawsuits	1	222	222	222	222
Client complaint forms	6	966	55439	115706	19284.3
Maintenance reports	2	2929	3209	6138	3069
Sum	36			241717

## Sheet: Year
Year of publication	Number of articles
2003	1
2004	1
2005	2
2006	2
2007	0
2008	0
2009	1
2010	0
2011	1
2012	1
2013	3	12
2014	2
2015	0
2016	4
2017	0
2018	2
2019	2
2020	5
2021	4
2022	3
2023	2	24
Sum	36

## Sheet: Building defect definition
Definitons	Number of Articles	Categorization
Watt, 1999	8
Ingvaldsen, 2001	3
None	15	7	yes
Kvande and Lisø, 2009	1
Their own def.	2
Ojo and Ljatuyi; Mansor et al., 2012	1
Juran and Godfrey 1999; Atkinson, 1999	1
Pheng and Wee, 2001; Isa et al.	1
Webster's Dictionary	1
Gatlin, 2013	1
Multiple definitions	1
Low and Wee, 2001	1
Sum	36
	Definitions
Main purpose of the studies	Watt, 1999	Ingvaldsen, 2001	None	Kvande and Lisø, 2009	Their own def.	Ojo and Ljatuyi; Mansor et al., 2012	Juran and Godfrey 1999; Atkinson, 1999	Pheng and Wee, 2001; Isa et al.	Webster's Dictionary	Gatlin, 2013	Multiple
Design challenges	0	1	1	0	0	0	0	0	0	0	0
Performance	0	0	0	0	0	0	0	0	0	0	0
Identification	4	1	7	0	1	1	0	1	1	0	0
Overview of typical defects	0	1	0	1	0	0	0	0	0	0	0
Classification	2	0	1	0	0	0	0	0	0	0	0
Building maintenance management	0	0	1	0	1	0	1	0	0	1	0
Quality management	1	0	3	0	0	0	0	0	0	0	0
Systematization in collection	0	0	0	0	0	0	0	0	0	0	0
	7	3	13	1	2	1	1	1	1	1	0	31
